# Supplementary material
Source: publisher figshare collection journal article supplement (https://gsajournals.figshare.com/articles/dataset/_/12174468)
Supplement: Supplementary file 1 [file 2]

### **An IT toolset**

The basic toolset for integrative targeting are the plasmid PCR templates for the IT cassettes (Table 1) and the plasmids and chromosomally-integrated constructs for expression of I-SceI (Table 1 and Table 2). In addition, there is a list of genomic target (GT) sites (Figure S1 and Table S2) that may be good sites for a variety of genome engineering applications. Finally, a set of yeast strains with the *IT4* cassette integrated is provided ready to use for chromosomal integrations. The following discussion summarizes the resources not fully described in the main paper.

### **Genomic target (GT) sites**

Chromosomal loci amenable to the integration of DNA have a wide variety of genome engineering applications, such as expression of individual genes or multi-gene pathways, reporters of promoter activity or protein stability, and control of gene dosage. Intergenic regions are easily identified in yeast genomes, and integrations sites chosen to minimize the potential for interference with neighboring genes. Good candidate sites can be found in large intergenic regions, as far as possible from the start codon of a neighboring gene, at least 200 bp from stop codons, and away from origins of replication or other functional elements. It is best to avoid AT-rich DNA sequences, which are particularly common in yeast terminators of transcription and origins of replication, and also required for the activity of subset of promoters (Yarger, Armilei and Gorman, 1986; Chen *et al.*, 1996; Sugihara, Kasahara and Kokubo, 2011; Miura *et al.*, 2019). Transposons and their remnants are also potential sites, although repetitive DNA elements within a transposon should be identified and their effects considered (Sakai, Shimizu and Hishinuma, 1990).

A set of potentially useful chromosomal sites (referred to as GTs) is provided (Figure S1 and Table S2). The sites were chosen by manual inspection of *S. cerevisiae* chromosomes, and include loci linked to centromeres, telomeres, and the rDNA array, but all are from regions with actively transcribed nearby genes.

### **Yeast strains with *GT:IT4* integrations, ready to use for integration**

Six yeast strains are provided with *IT4* integrated into individual GT sites (Table 2). As in other applications of the IT method, integrations do not require a selectable marker, DNA constructs have been successfully integrated into *GT1* and *GT2*, but the use of any particular integration site requires a minimum of phenotypic analysis to reveal potential negative consequences. The suitability of *S. cerevisiae* chromosomal sites for heterologous expression can depend on local effects which are difficult to predict and best evaluated by the integration of a transcriptional reporter (Flagfeldt *et al.*, 2009).

### **Yeast strains for *GAL* expression control of chromosomally-integrated genes**

The *IT4* cassette has been integrated into the native *GAL1* and *GAL10* genes, and the strains are provided (Table 2). The chromosomal *gal1::IT4* and *gal10::IT4* constructs can be used as integration targets that place genes under *GAL* control, and their presence can be followed by a Gal<sup>-</sup> phenotype. The stable expression of foreign genes under *GAL* control may be a useful for large-scale assays of conditional gene expression or overexpression phenotypes. When introducing foreign DNA into the *gal1::IT* and *gal10::IT* cassettes, it is important to express I-

SceI from a construct that does not carry a repair template for the DSB site. For example, when replacing a *gal1::IT* cassette, I-SceI should not be expressed from a *pGAL1* construct, but from *pGAL10*. Conversely, when replacing *gal10::IT* cassettes, I-SceI should be under *pGAL1* control. The I-SceI expression plasmids (Table 1) provide flexibility to avoid this problem.

## REFERENCES

- Chen, S. *et al.* (1996) “Transcriptional terminators of RNA polymerase II are associated with yeast replication origins,” *Nucleic Acids Research*, 24(15), pp. 2885–2893. doi: 10.1093/nar/24.15.2885.
- Flagfeldt, D. B. *et al.* (2009) “Characterization of chromosomal integration sites for heterologous gene expression in *Saccharomyces cerevisiae*,” *Yeast (Chichester, England)*, 26(10), pp. 545–551. doi: 10.1002/yea.
- Miura, O. *et al.* (2019) “A strong structural correlation between short inverted repeat sequences and the polyadenylation signal in yeast and nucleosome exclusion by these inverted repeats,” *Current Genetics*. Springer Berlin Heidelberg, 65(2), pp. 575–590. doi: 10.1007/s00294-018-0907-8.
- Sakai, A., Shimizu, Y. and Hishinuma, F. (1990) “Integration of heterologous genes into the chromosome of *Saccharomyces cerevisiae* using a delta sequence of yeast retrotransposon Ty,” *Applied Microbiology and Biotechnology*, 33(3), pp. 302–306. doi: 10.1007/BF00164526.
- Sugihara, F., Kasahara, K. and Kokubo, T. (2011) “Highly redundant function of multiple AT-rich sequences as core promoter elements in the TATA-less RPS5 promoter of *Saccharomyces cerevisiae*,” *Nucleic Acids Research*, 39(1), pp. 59–75. doi: 10.1093/nar/gkq741.
- Yarger, J. G., Armilei, G. and Gorman, M. C. (1986) “Transcription terminator-like element within a *Saccharomyces cerevisiae* promoter region,” *Molecular and Cellular Biology*, 6(4), pp. 1095–1101. doi: 10.1128/mcb.6.4.1095.

Yellman 2020, Figure S1

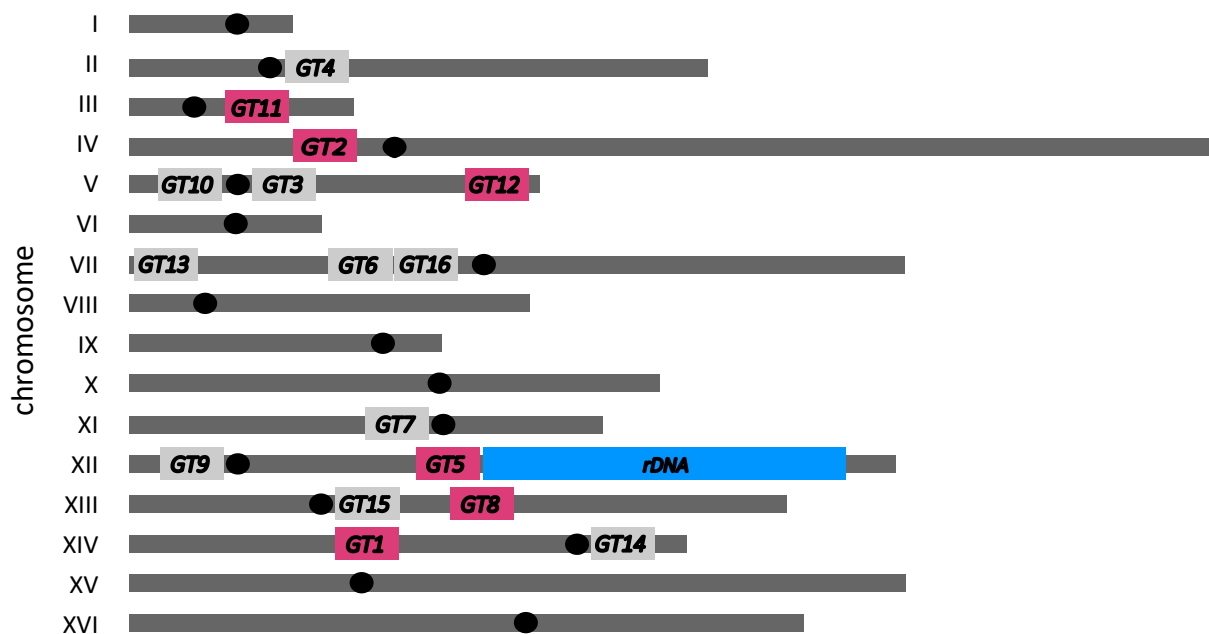

**Figure S1. Genomic targets (GTs): chromosomal loci amenable to the integration of foreign DNA.** Approximate locations of GT sites in the genome of *S. cerevisiae*. Chromosomes lengths are proportional to their actual sizes, and centromeres are marked with black ovals. The *IT4* cassette was integrated at six GTs (fuchsia) on different yeast chromosomes.

**Table S1. Oligonucleotides used in this study.**

| oligo                                                                                                                                | sequence (5'-3')                                                                                                       | notes                     |
|--------------------------------------------------------------------------------------------------------------------------------------|------------------------------------------------------------------------------------------------------------------------|---------------------------|
| To integrate IT cassettes into <i>SPO12</i> (352-375) (genomic target sequences in light font, <i>IT</i> cassette annealing in bold) |                                                                                                                        |                           |
| IT24F                                                                                                                                | GGGATCTTTTAAACAGGATCCGAAGAGGAAACTCCAAC TACAACAAAGATTTGCACGGAC <b>CGTCACGACCTGCGAT</b>                                  | <i>spo12::IT</i>          |
| IT24R                                                                                                                                | GGATTGACTTTCTTTTTCTTTCCGAACATCTTAAC TTTGTGCTCATTCAATTTCAATGAGCATGG <b>GGCTGTCAGGCGTGCACGAT</b>                         |                           |
| To repair <i>spo12</i> (352-375):: <i>IT</i> with phosphorylation site mutations (genomic identity in light font, mutations in bold) |                                                                                                                        |                           |
| 12AAF                                                                                                                                | CCGAAGAGGAAACTCCAAC TACAACAAAGATTTGCAG <b>CA</b> CCGACTGACAGGCTGGTAG <b>CA</b> CCATGCTCATTGAAATTGAATGAGCACAAAGTTAAGATG | <i>spo12-S118A, S125A</i> |
| 12AAR                                                                                                                                | CATCTTAAC TTTGTGCTCATTCAATTTCAATGAGCATGG <b>TG</b> CTACCAGCCTGTCAGTCGG <b>TG</b> CTGCAAATCTTTGTTGTAGTTGGAGTTTCCTCTTCGG |                           |
| 12DDF                                                                                                                                | CCGAAGAGGAAACTCCAAC TACAACAAAGATTTGCAG <b>AT</b> CCGACTGACAGGCTGGTAG <b>AT</b> CCATGCTCATTGAAATTGAATGAGCACAAAGTTAAGATG | <i>spo12-S118D, S125D</i> |
| 12DDR                                                                                                                                | CATCTTAAC TTTGTGCTCATTCAATTTCAATGAGCATGG <b>AT</b> CTACCAGCCTGTCAGTCGG <b>AT</b> CTGCAAATCTTTGTTGTAGTTGGAGTTTCCTCTTCGG |                           |
| 12EEF                                                                                                                                | CCGAAGAGGAAACTCCAAC TACAACAAAGATTTGCAG <b>AA</b> CCGACTGACAGGCTGGTAG <b>AA</b> CCATGCTCATTGAAATTGAATGAGCACAAAGTTAAGATG | <i>spo12-S118E, S125E</i> |
| 12EER                                                                                                                                | CATCTTAAC TTTGTGCTCATTCAATTTCAATGAGCATGG <b>TT</b> CTACCAGCCTGTCAGTCGG <b>TT</b> CTGCAAATCTTTGTTGTAGTTGGAGTTTCCTCTTCGG |                           |
| To synthesize IT cassettes that precise replace yeast genes (genomic target sequences in light font, IT cassette annealing in bold)  |                                                                                                                        |                           |
| IT36F                                                                                                                                | TGAAGTTCAAGAGAAGTGGGTAAGAATACATTGAACTAAGCCTTCATATATTTACAAAAC <b>CGGACGTCACGACCTGCG</b>                                 | <i>pre5::IT</i>           |
| IT36R                                                                                                                                | AAGGCTTCTTTGGTCTTGCTTTGACAATTGCTTAGTGGAACGATACTTTGTGTCCAGAC <b>GGCTGTCAGGCGTGCACG</b>                                  |                           |
| IT37F                                                                                                                                | ACCTTCAAGTTAGTGCTCAGCAGTTCATCAGGATCAGTTGCATAAACACAATTACACAAAC <b>CGGACGTCACGACCTGCG</b>                                | <i>pre6::IT</i>           |
| IT37R                                                                                                                                | TGCATTTTTATTATTGCTGTTATTTTATATAGGTTTTATGCCCAATATATATCGCCGTTT <b>GGCTGTCAGGCGTGCACG</b>                                 |                           |
| IT39F                                                                                                                                | TTTTTAGTTTCAATTAGTAGTAAGCAACCATAAGACACCAATCAACACAGTTCTATAATT <b>CGGACGTCACGACCTGCG</b>                                 | <i>pre8::IT</i>           |
| IT39R                                                                                                                                | AATTGGCTTTCTTTTGGATAAGTTGAGTGAGATGGGTGATTGGCGGGGATAATTATAAC <b>AGGCTGTCAGGCGTGCACG</b>                                 |                           |
| IT40F                                                                                                                                | AGTTTTTCGATCAGTCTCTATTTTAATAATTGATTATTGGATATAGTTAGTAGTGTTAAAC <b>CGGACGTCACGACCTGCG</b>                                | <i>pre9::IT</i>           |
| IT40R                                                                                                                                | AGATATGTTTCTATGCGTACATATTTATATAAGCATGAAGTCAAACAATACTTTCCAACC <b>GGCTGTCAGGCGTGCACG</b>                                 |                           |
| IT41F                                                                                                                                | AGCTTTCAAACACATTCGAGCGTCGCATCATCAAATTAACAAAAGCATAACTCTTCAGCAC <b>CGGACGTCACGACCTGCG</b>                                | <i>pre10::IT</i>          |
| IT41R                                                                                                                                | CACGTGAGTTCATATTATTTCAACTCTTTGGTTCTTCTTAACGTATTATCAGAATGTCAC <b>GGCTGTCAGGCGTGCACG</b>                                 |                           |
| IT43F                                                                                                                                | AACTATAGAATACAAGTCAATAAGAACATAAATTCCAATTGTCTAATATAACTAGAAAGG <b>CGGACGTCACGACCTGCG</b>                                 | <i>pup2::IT</i>           |
| IT43R                                                                                                                                | TTTGTAAGGTTTTCTTTCTTTGTTAGTGTGACGTTGGTATTTACCTTTATGTAAC TATAT <b>GGCTGTCAGGCGTGCACG</b>                                |                           |

|                                                                                                                                                         |                                                                                                  |          |
|---------------------------------------------------------------------------------------------------------------------------------------------------------|--------------------------------------------------------------------------------------------------|----------|
| IT60F                                                                                                                                                   | CAATTGAGATATTTTTTTGAACCATCGTAATAAAATCAAGGAAGTTAGGAACATACGGAC <b>CGGACGTCACGACCTGCG</b>           | rpt1::IT |
| IT60R                                                                                                                                                   | GTTGTACTTGTTGTTTTTATTAACCCCTTCTCATAATATATAATAAAAAAGTACATTGACG <b>GGCTGTCAGGCGTGCACG</b>          |          |
| IT61F                                                                                                                                                   | GTGTCAAGCTTACAGTCAATTCAAGTTAAAGAAGAGACAGCGTTTTTAAATAGAAAATAAA <b>CGGACGTCACGACCTGCG</b>          | rpt2::IT |
| IT61R                                                                                                                                                   | GCTTTGTTGAAGCATTACTTATATACGTAAATCTATTATAGAAAAATGTAAATGGGCACAG <b>GCTGTCAGGCGTGCACG</b>           |          |
| IT62F                                                                                                                                                   | GTTATACAAGAGGCAATCGGATAAAATTCAAGTATTTATAAAGTAAAAACCACAACAAGAC <b>CGGACGTCACGACCTGCG</b>          | rpt3::IT |
| IT62R                                                                                                                                                   | TGCTAGATAGAAATGTACGTAATACTTTATGTAGACCTACGTTGAAGCATATATGGTA <b>AGGCTGTCAGGCGTGCACG</b>            |          |
| IT64F                                                                                                                                                   | GTGACTTATTTGTGCATTATAGAGGTGAGAACAAATTGGAAAGTTTTGATTTTAGTTTAAG <b>CGGACGTCACGACCTGCG</b>          | rpt5::IT |
| IT64R                                                                                                                                                   | GGATTGTTCTAATATGTAGATATGTGAATGGCGGCTTGATAAATCAAATATTATTATTT <b>GGCTGTCAGGCGTGCACG</b>            |          |
| IT45F                                                                                                                                                   | CTTCATGCTAAATCATATAAGGGCAGAGACGAAGCAAAGCGAAAAAACATATTACAATC <b>CGGACGTCACGACCTGCG</b>            | scl1::IT |
| IT45R                                                                                                                                                   | CCATACATATATTGAGTGTTGACGCGTGTGATTTACATTATGTTGTGGCAGGAAGTAT <b>GGCTGTCAGGCGTGCACG</b>             |          |
| To amplify IT cassettes for integration into selected genomic (GT) target sites (genomic target sequences in light font, IT cassette annealing in bold) |                                                                                                  |          |
| IT07F                                                                                                                                                   | GATCGTCATAACCAAATATTGCTAGAAACAAAAGCGTTCGGGATAGGTCAAACCATGATGAAC <b>CGGACGTCACGACCTGCGAT</b>      | GT1::IT  |
| IT07R                                                                                                                                                   | GTCAGACATTCCATAAATTTGCCCTTTTTAAAAAATAGCACGCTTTAAGATATGCGTGTGGAAC <b>TAGGCTGTCAGGCGTGCACGAT</b>   |          |
| IT23F                                                                                                                                                   | GCGTATATATACAGAAAATTTTATTATTTTATATTCAAAAACAAGAAAACAAAAGAGAAAACATTAAC <b>CGGACGTCACGACCTGCGAT</b> | GT2::IT  |
| IT23R                                                                                                                                                   | CATACAGGATTTAAAGAAACAGTTGTAAAAAGTATTACTTTCTAGGACTATTAGTTATGAAAATTACAG <b>GCTGTCAGGCGTGCACGAT</b> |          |
| IT08F                                                                                                                                                   | GCCATTTTCTTGGA CTGTAAATCATACTTGATGTTGTGCATTAGTCAATAATCGGTTCTTGTTC <b>CCGGACGTCACGACCTGCGAT</b>   | GT5::IT  |
| IT08R                                                                                                                                                   | CACCAAAAGGACCGCCGCATGATTTACCATAATTATTTCTCCCTTCATTTACATGTAATCGTT <b>GGCTGTCAGGCGTGCACGAT</b>      |          |
| IT09F                                                                                                                                                   | GAAGGAGGTCACAACCGCGAGAGAAAGTAAGATGTCATGTTTTTGAATATGAACCTGGAG <b>CGGACGTCACGACCTGCGAT</b>         | GT8::IT  |
| IT09R                                                                                                                                                   | CCTACATTTTCAAGTTAAATAAATCTAAAGGTGCCACTGGAAAGAGTTATATGCGAG <b>GGCTGTCAGGCGTGCACGAT</b>            |          |
| IT10F                                                                                                                                                   | CAAGACCTATATATTAAAGTAAACAACATTGAATCAGATCGCATACTGGTGTAG <b>CGGACGTCACGACCTGCGAT</b>               | GT11::IT |
| IT10R                                                                                                                                                   | CCTTCCCAAACGTGTCCACACCAAATTGAGCACCCCTGCTCGATTATCATATGTCTACTTCACGT <b>GGCTGTCAGGCGTGCACGAT</b>    |          |
| IT11F                                                                                                                                                   | GGGGTGCTTTGGGTTTATTTAATCGTCAAATATAGTCCGATTTGTCTCATTATTCTTGTGT <b>CCGGACGTCACGACCTGCGAT</b>       | GT12::IT |
| IT11R                                                                                                                                                   | GGAAAAATTGCAGAATATCTAGGTAGTAGTCGCTTCAATAAATTTTTTTCC <b>GGCTGTCAGGCGTGCACGAT</b>                  |          |

**Table S2. Genomic target (GT) sites.**

| locus       | chromosome      | SGD coordinates | comments                                                      |
|-------------|-----------------|-----------------|---------------------------------------------------------------|
| <i>GT1</i>  | XIV, left arm   | 335522/335523   | <i>CBK1-YGP1</i> intergenic                                   |
| <i>GT2</i>  | IV, left arm    | 443742/443743   | 5967 bp left of <i>CEN4</i> ; <i>ATP16-MCD1</i> intergenic    |
| <i>GT3</i>  | V, right arm    | 152859/152860   | 755 bp right of <i>CEN5</i>                                   |
| <i>GT4</i>  | II, right arm   | 45436/45437     | 455 bp right of <i>CEN2</i>                                   |
| <i>GT5</i>  | XII, right arm  | 449338/449339   | ~2.5kb left of the rDNA array                                 |
| <i>GT6</i>  | VII, left arm   | 324086/324087   | <i>SRM1-TOS8</i> intergenic, tightly linked to <i>GT16</i>    |
| <i>GT7</i>  | XI, left arm    | 439817/439818   | 311 bp left of <i>CEN11</i>                                   |
| <i>GT8</i>  | XIII, right arm | 512029/512030   | <i>NCW1-PKR1</i> intergenic                                   |
| <i>GT9</i>  | XII, left arm   | 150359/150360   | 468 bp left of <i>CEN12</i>                                   |
| <i>GT10</i> | V, left arm     | 151409/151410   | 577 bp left of <i>CEN5</i>                                    |
| <i>GT11</i> | III, right arm  | 116855/116856   | 856 bp right of <i>CEN3</i> , <i>YCR001W-CDC10</i> intergenic |
| <i>GT12</i> | V, right arm    | 555845/555846   | subtelomeric, <i>FAU1-TOG1</i> intergenic                     |
| <i>GT13</i> | VII, left arm   | 16719/16720     | subtelomeric, <i>ADH4-ZRT1</i> intergenic                     |
| <i>GT14</i> | XIV, right arm  | 629371/629372   | 496 bp right of <i>CEN14</i>                                  |
| <i>GT15</i> | XIII, right arm | 268744/268745   | 595 bp right of <i>CEN13</i>                                  |
| <i>GT16</i> | VII, left arm   | 328174/328175   | <i>TOS8-VPS45</i> intergenic, in transposon <i>YGLWdelta6</i> |

**Table S3. Reaction conditions for PCR synthesis of *IT* cassettes.****Notes:**

The first few amplification cycles of the PCR synthesis use an annealing temperature appropriate to the common regions of all synthesis primers. Subsequent amplification cycles use a higher annealing temperature based on the  $T_m$  of the full-length primers. We show 70°C as the higher  $T_m$ , but that value should be adjusted depending on the specific primer sequences used. The PCR products should be purified over a DNA minicolumn before being used in a high-efficiency PEG/LiOAc transformation of yeast.

predicted product sizes (base pairs):

*IT1*: 1260 + ~ 80 = ~ 1340

*IT2, IT3*: 1278 + ~ 80 = ~ 1358

*IT4, IT5*: 1296 + ~ 80 = ~ 1376

**REACTION MIXTURE**

|                         | reagent                       | volume used per rxn (μl) | final concentration |
|-------------------------|-------------------------------|--------------------------|---------------------|
| <b>H<sub>2</sub>O</b>   | pure water                    | 7.5                      | -                   |
| <b>RXN mix</b>          | 2x KAPA HiFi reaction mixture | 10                       | 1x                  |
| <b>MgCl<sub>2</sub></b> | in reaction mixture           | -                        | 2.5mM               |
| <b>dNTPs</b>            | in reaction mixture           | -                        | 0.3mM               |
| <b>polymerase</b>       | in reaction mixture           | -                        | 0.4U total          |
| <b>primers</b>          | mixed primers, 3μM each       | 2                        | 0.3μM each          |
| <b>template</b>         | 20x-diluted plasmid DNA       | 0.5                      | 5ng total           |
| <b>each rxn</b>         | complete reaction mixture     | 20                       | -                   |

**THERMOCYCLER PROGRAM**

|                                         | # of cycles | denaturation | annealing  | synthesis   |
|-----------------------------------------|-------------|--------------|------------|-------------|
| <b>initial denaturation</b>             | 1           | 96°C / 60s   |            |             |
| <b>1<sup>st</sup> amplification set</b> | 3           | 96°C / 20s   | 56°C / 30s | 72°C / 75s  |
| <b>2<sup>nd</sup> amplification set</b> | 30          | 96°C / 20s   | 70°C / 30s | 72°C / 75s  |
| <b>final amplification</b>              | 1           |              |            | 72°C / 120s |
| <b>store</b>                            | 1           |              | 4°C / hold |             |
